# Supplementary material for: Accelerated Laboratory Weathering of Polypropylene/Poly (Lactic Acid) Blends
Source: MDPI journal article supplement (doi:10.3390/polym15010017), 2022-12-21
Supplement: s1 [file s1]

## Accelerated Laboratory Weathering of Polypropylene/Poly (Lactic Acid) Blends

Qihua Zhou \*, Xuan Liu, Yanzhen Lu, Xiaoyao Dao and Liuqing Qiu

School of Chemistry and Chemical Engineering, Hefei Normal University, Hefei 230601, China;

\* Correspondence: zhouqihua@hfnu.edu.cn; Tel.: +86-551-63674145

Tensile and flexural tests were conducted with a CMT6104 microcomputer controlled electronic universal testing machine (Shenzhen Xinsansi Material Testing Co., Ltd, Shenzhen, China) according to ASTM D638 standard, the tensile test speed was fixed at 50 mm/min. Notched Impact testing was conducted according to ASTM D256 with a ZBC8400-B pendulum impact testing machine (Shenzhen Xinsansi Material Testing Co., Ltd, Shenzhen, China). In all cases, 5 specimens were tested, and the average values were reported. The PP / PLA8.2 and PP / PLA8.2c before weathering were quenched by liquid nitrogen, and the cross sections were sprayed with gold by ion sputtering instrument. The section morphology of PP/PLA blends was performed using scanning electron microscopy (SEM) observations (SU-1510, Hitachi, Tokyo, Japan) with an accelerating voltage of 10.0 kV.

**Table S1.** Characteristics of PP/PLA blends different compositions before weathering.

| Blends     | Tensile strength (MPa) | Elongation at break (%) | Flexural strength (MPa) | Flexural modulus (MPa) | Impact strength (kJ/m <sup>3</sup> ) | $\rho$ (g/cm <sup>3</sup> ) |
|------------|------------------------|-------------------------|-------------------------|------------------------|--------------------------------------|-----------------------------|
| PP/PLA10.0 | 24.46                  | 72.48                   | 21.48                   | 923                    | 3.64                                 | 0.90                        |
| PP/PLA9.1  | 22.7                   | 71.92                   | 26.15                   | 1083                   | 3.69                                 | 0.922                       |
| PP/PLA8.2  | 29.15                  | 13.00                   | 31.27                   | 1281                   | 4.57                                 | 0.949                       |
| PP/PLA7.3  | 29.15                  | 7.35                    | 37.09                   | 1538                   | 6.08                                 | 0.981                       |
| PP/PLA6.4  | 29.03                  | 6.60                    | 42.16                   | 1669                   | 6.19                                 | 1.008                       |
| PP/PLA5.5  | 29.42                  | 6.00                    | 47.05                   | 1867                   | 5.44                                 | 1.037                       |

|                      |       |       |       |      |      |       |
|----------------------|-------|-------|-------|------|------|-------|
| PP/PLA4.6            | 33.42 | 5.49  | 53.36 | 2200 | 5.45 | 1.069 |
| PP/PLA3.7            | 37.96 | 5.77  | 56.01 | 2328 | 5.83 | 1.115 |
| PP/PLA2.8            | 44.65 | 5.86  | 66.84 | 2618 | 5.20 | 1.153 |
| PP/PLA1.9            | 52.18 | 6.60  | 73.17 | 2991 | 6.20 | 1.191 |
| PP/PLA0.10           | 70.04 | 5.63  | 99.41 | 3663 | 3.96 | 1.280 |
| PP/PLAs <sup>1</sup> | 20.95 | 202.8 | 18.92 | 805  | 4.16 | 0.950 |

---

<sup>1</sup> PP/PLA sample provided by Jieshou Tianlu Packaging Materials Co., Ltd.

**Table S2.** Characteristics of PP/PLA8.2 and PP/PLA8.2c before weathering.

| Blends     | Tensile strength (MPa) | Elongation at break (%) | Flexural strength (MPa) | Flexural modulus (MPa) | Impact strength (kJ/m <sup>3</sup> ) | $\rho$ (g/cm <sup>3</sup> ) |
|------------|------------------------|-------------------------|-------------------------|------------------------|--------------------------------------|-----------------------------|
| PP/PLA8.2  | 29.15                  | 13                      | 31.27                   | 1281                   | 4.57                                 | 0.949                       |
| PP/PLA8.2c | 23.78                  | 33.86                   | 27.01                   | 1078                   | 7.82                                 | 0.943                       |

**Table S3.**  $T_i$  of blends before and after accelerated weathering 60 days.

| Blends     | Before accelerated weathering(°C) | After 60 days(°C) |
|------------|-----------------------------------|-------------------|
| PP/PLA10.0 | 412.8                             | 344.0             |
| PP/PLA9.1  | 329.7                             | 324.0             |
| PP/PLA8.2  | 332.2                             | 320.2             |
| PP/PLA7.3  | 338.2                             | 332.5             |
| PP/PLA6.4  | 325.7                             | 311.6             |
| PP/PLA5.5  | 328.6                             | 305.4             |
| PP/PLA4.6  | 326.4                             | 305.6             |
| PP/PLA3.7  | 325.6                             | 303.5             |
| PP/PLA2.8  | 330.8                             | 254.7             |
| PP/PLA1.9  | 333.3                             | 299.8             |
| PP/PLA0.10 | 334.8                             | 328.3             |

**Table S4.**  $T_i$  of PP/PLA8.2 and PP/PLA8.2c blends before and after different accelerated weathering times.

| Blends     | 0 d   | 30 d  | 60 d  | 90 d  | 150 d |
|------------|-------|-------|-------|-------|-------|
| PP/PLA8.2  | 332.2 | 334.7 | 320.2 | 274.8 | 291.3 |
| PP/PLA8.2c | 339.8 | 339.8 | 310.4 | 270.6 | 274.8 |

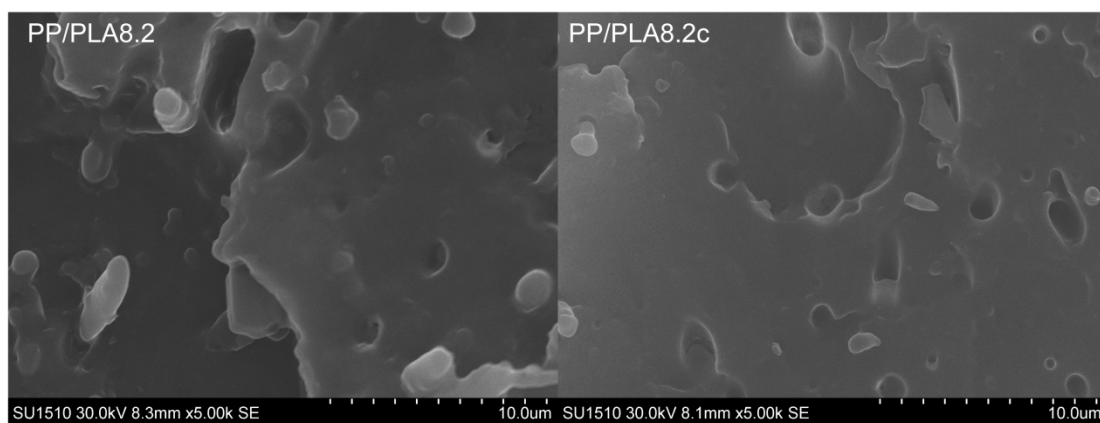

**Figure S1.** SEM of PP/PLA8.2 and PP/PLA8.2c blends before weathering.
